# Supplementary material for: Structural transformation of selenidostannates from 1D to 0D and 2D via a stepwise amine-templated assembly strategy
Source: Royal Society of Chemistry journal article supplement (doi:10.1039/c7dt01546a), 2017-01-01
Supplement: c7dt01546a1.pdf [file c7dt01546a1.pdf]

*Supporting Information*

**Structural Transformation of Selenidostannates from 1D  
to 0D and 2D *via* Stepwise Amine-Templated Assembly  
Strategy**

Dandan Hu,<sup>‡</sup> Yingying Zhang,<sup>‡</sup> Huajun Yang, Jian Lin, and Tao Wu\*

College of Chemistry, Chemical Engineering and Materials Science, Soochow University, Suzhou, Jiangsu  
215123, China

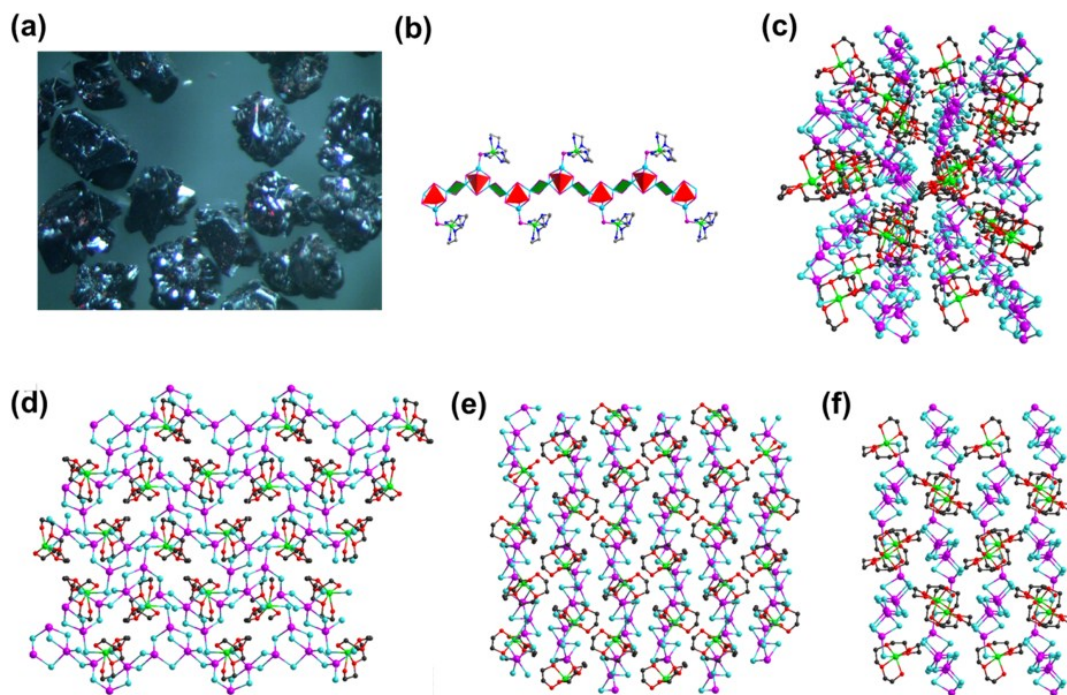

**Fig. S1** (a) Crystal morphology of **1**; (b) 1D chain unit of  $[\text{Sn}_3\text{Se}_7\text{Fe}(\text{TEPA})]_n$ ; (c-d) the packing diagram viewed along crystal unit axis.

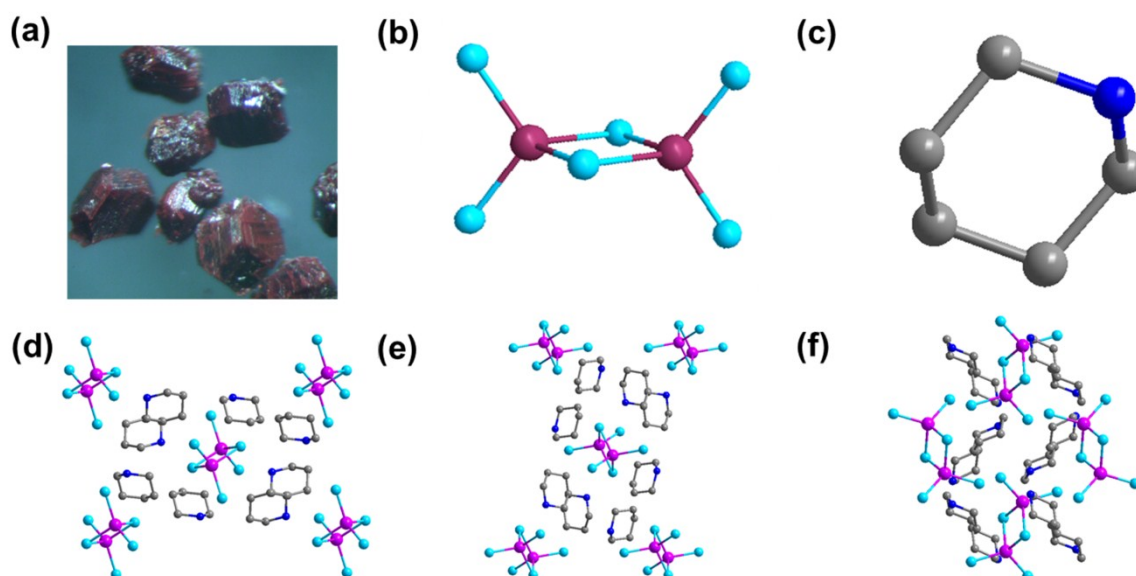

**Fig. S2** (a) The transmission pattern of 0D  $[\text{Sn}_2\text{Se}_6] \cdot 4(\text{H}^+\text{-PR})$  dimer crystal morphology; (b) the structure of  $\text{Sn}_2\text{Se}_6^{4-}$  dimer; (c) the counter ions, namely  $2(\text{H}^+\text{-PR})$ ; (d) packing mode of the  $\text{Sn}_2\text{Se}_6^{4-}$  dimer crystal viewed along a axis; (e) packing mode of the  $\text{Sn}_2\text{Se}_6^{4-}$  dimer crystal viewed along b axis; (f) packing mode of the  $\text{Sn}_2\text{Se}_6^{4-}$  dimer crystal viewed along c axis.

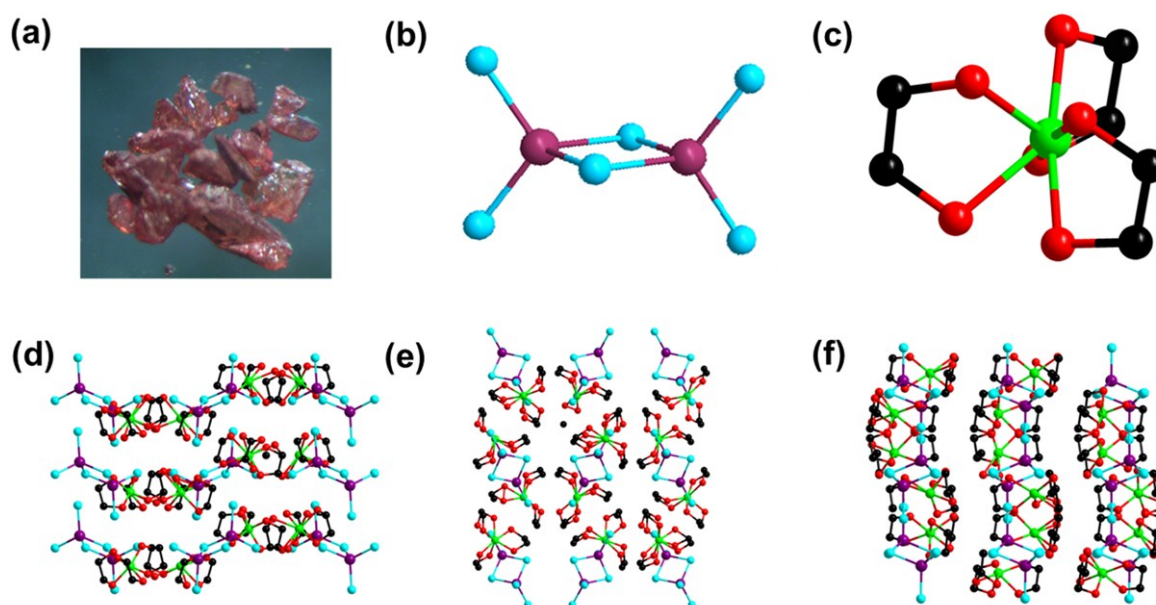

**Fig. S3** (a) The transmission pattern of 0D  $[\text{Sn}_2\text{Se}_6]\cdot 2[\text{Fe}(\text{en})_3]$  dimer crystal morphology; (b) the structure of  $\text{Sn}_2\text{Se}_6^{4-}$  dimer; (c) the counter ions, namely  $[\text{Fe}(\text{en})_3]^{2+}$ ; (d) packing mode of the  $\text{Sn}_2\text{Se}_6^{4-}$  dimer crystal viewed along  $a$  axis; (e) packing mode of the  $\text{Sn}_2\text{Se}_6^{4-}$  dimer crystal viewed along  $b$  axis; (f) packing mode of the  $\text{Sn}_2\text{Se}_6^{4-}$  dimer crystal viewed along  $c$  axis.

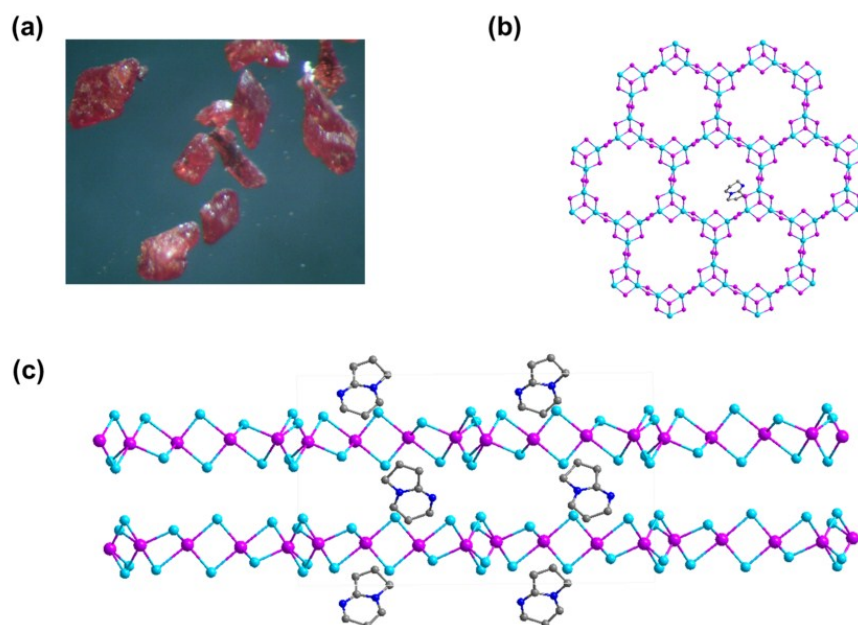

**Fig. S4** (a) Crystal morphology of **4**; (b) 2D layer; (c) packing mode of the 2D  $[\text{Sn}_3\text{Se}_7]_n\cdot 2n(\text{H}^+\text{-DBN})$  layer crystal viewed along  $b$  axis. 2D  $[\text{Sn}_3\text{Se}_7]_n\cdot 2n(\text{H}^+\text{-DBN})$  layer possess a famous 6 net  $[\text{Sn}_3\text{Se}_7]_n^{2n-}$  lamellar structure with protonated DBN located in the inter-layer spaces. The lamellar  $[\text{Sn}_3\text{Se}_7]_n^{2n-}$  anion could be viewed as consisted by the  $[\text{Sn}_3\text{Se}_7]_n^{2n-}$  single chains linked the adjacent  $[\text{Sn}_3\text{Se}_7]_n^{2n-}$  chains through the terminal Se atoms of the  $\text{SnSe}_4$  tetrahedral. And, the  $[\text{Sn}_3\text{Se}_7]$  units are interconnected with each other by edge-sharing two Se atoms forming an chain.

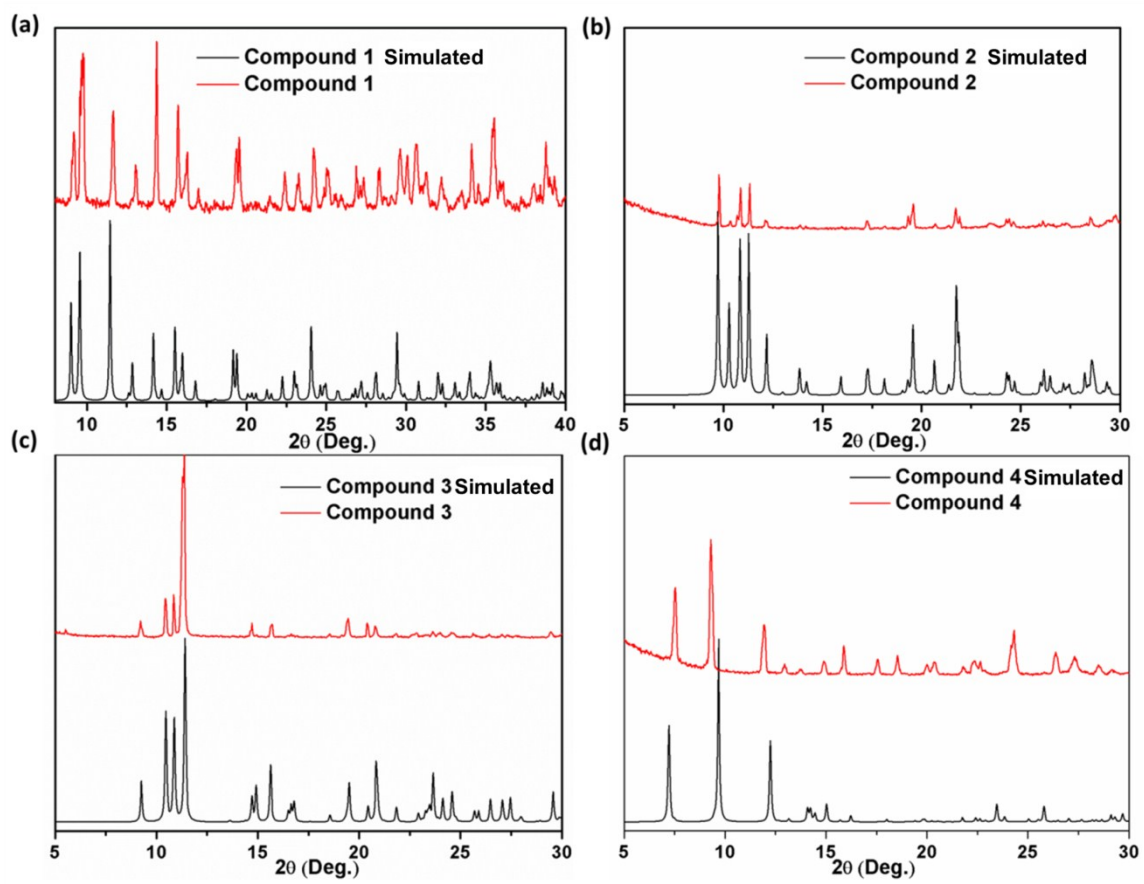

**Fig. S5** The simulated and experimental PXRD patterns of compound 1-4.

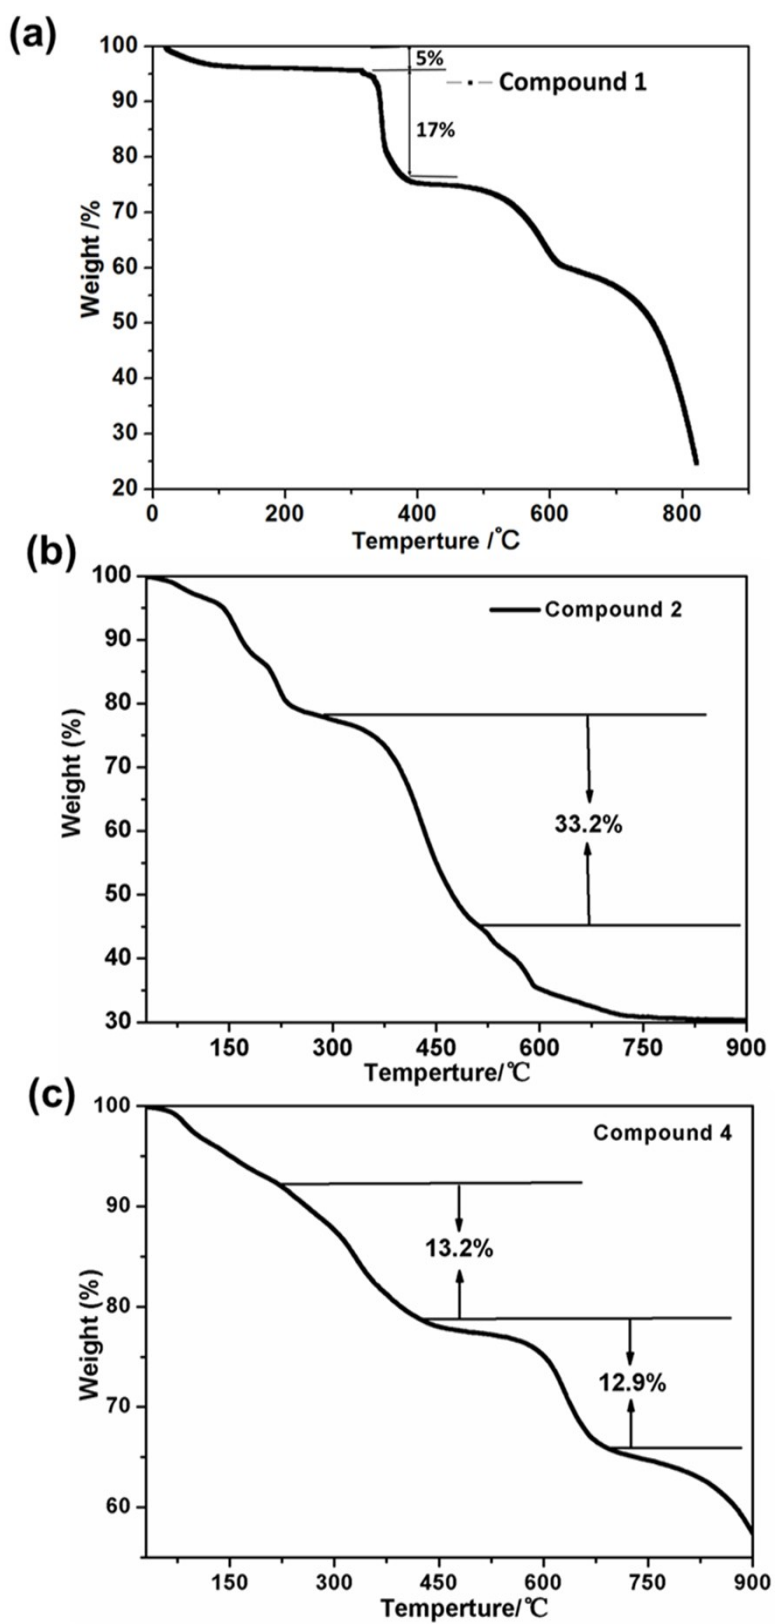

Fig. S6 TGA curve for compound 1, 2 and 4.

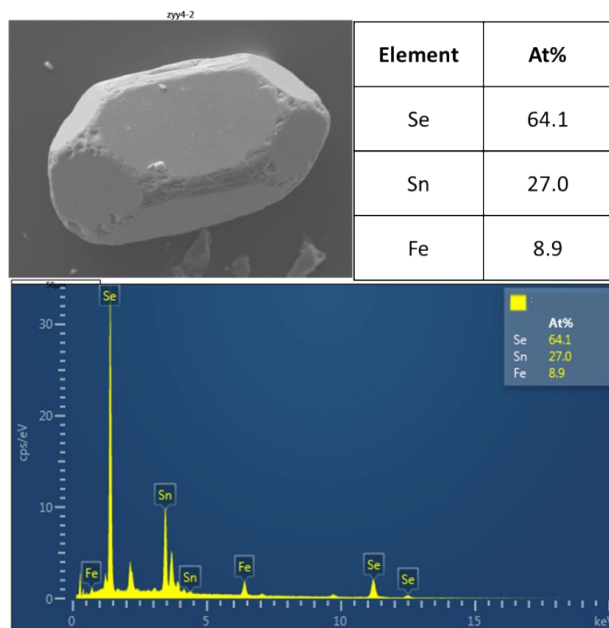

**Fig. S7** EDX spectrum of compound 1.

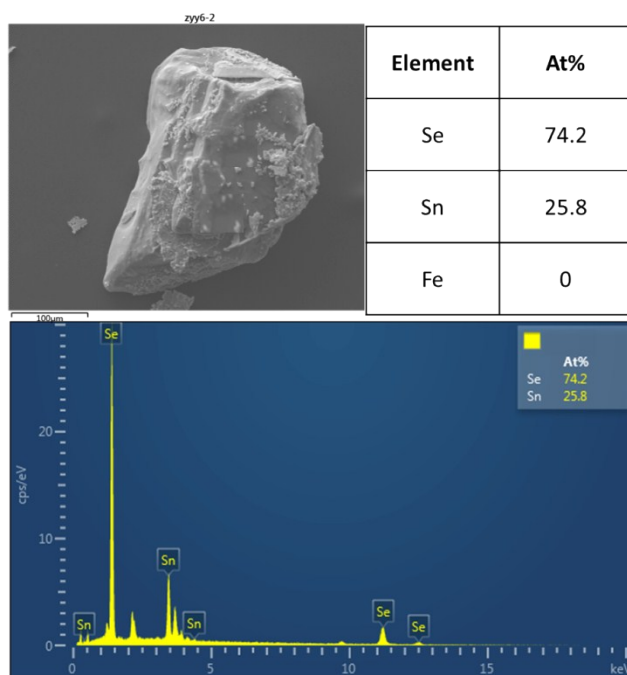

**Fig. S8** EDX spectrum of compound 2.



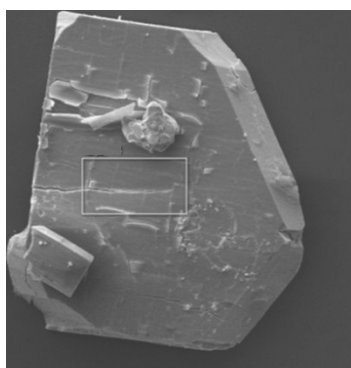

| Element | At%  |
|---------|------|
| Se      | 60.6 |
| Sn      | 20.5 |
| Fe      | 18.9 |

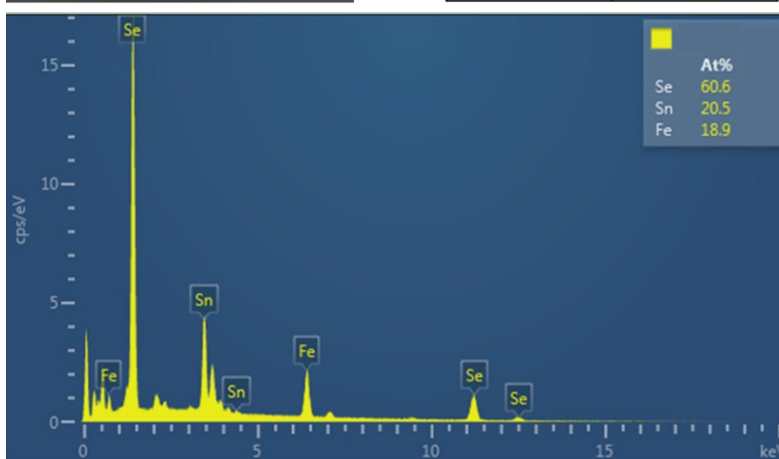

**Fig. S9** EDX spectrum of compound 3.

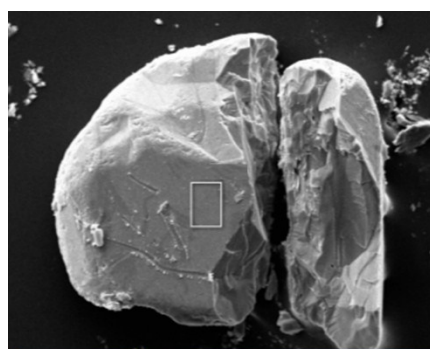

| Element | At%  |
|---------|------|
| Se      | 69.1 |
| Sn      | 30.9 |
| Fe      | 0    |

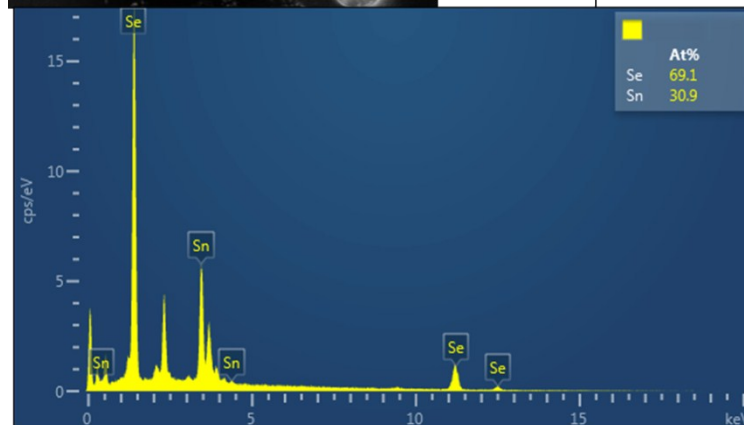

**Fig. S10** EDX spectrum of compound 4.

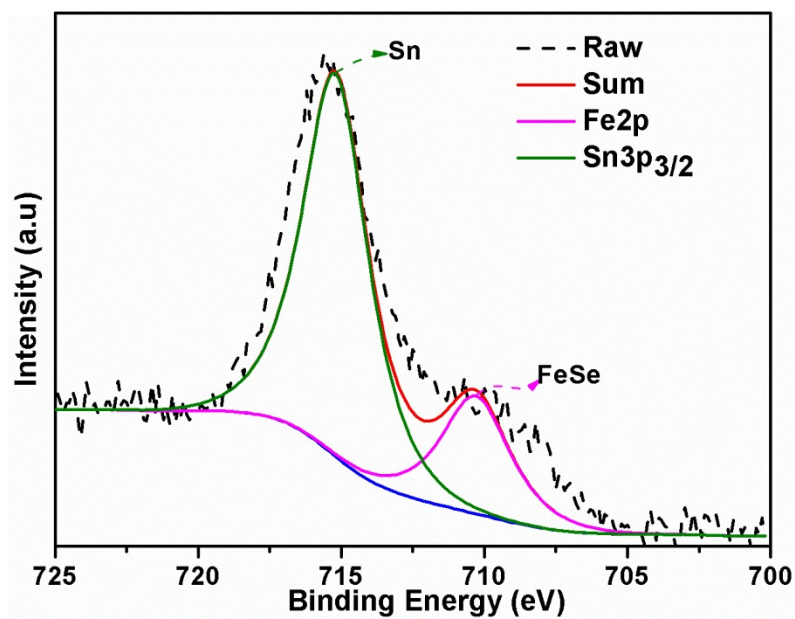

**Fig. S11** The X-ray photoelectron spectroscopy (XPS) of compound 1.



**Table S1 Crystal Data and Structure Refinement Parameters for Compound 1-4.**

| Compound                                                                             | 1                                                     | 2                                                                | 3                                                                  | 4                                                                 |
|--------------------------------------------------------------------------------------|-------------------------------------------------------|------------------------------------------------------------------|--------------------------------------------------------------------|-------------------------------------------------------------------|
| Formula                                                                              | [Sn <sub>3</sub> Se <sub>7</sub> Fe(TEPA)]            | [Sn <sub>2</sub> Se <sub>6</sub> ] $\cdot$ 4(H <sup>+</sup> -PR) | [Sn <sub>2</sub> Se <sub>6</sub> ] $\cdot$ 2[Fe(en) <sub>3</sub> ] | [Sn <sub>3</sub> Se <sub>7</sub> ] $\cdot$ 2(H <sup>+</sup> -DBN) |
| Crystal system                                                                       | Orthorhombic                                          | Monoclinic                                                       | Orthorhombic                                                       | Orthorhombic                                                      |
| Z                                                                                    | 4                                                     | 2                                                                | 8                                                                  | 2                                                                 |
| Space group                                                                          | <i>P</i> 2 <sub>1</sub> 2 <sub>1</sub> 2 <sub>1</sub> | <i>P</i> 2 <sub>1</sub> / <i>n</i>                               | <i>Pbca</i>                                                        | <i>Cmc</i> 2 <sub>1</sub>                                         |
| cell (Å)                                                                             | <i>a</i> = 12.4953(3)                                 | <i>a</i> = 10.3277(4)                                            | <i>a</i> = 15.5062(9)                                              | <i>a</i> = 13.4435(4)                                             |
|                                                                                      | <i>b</i> = 13.7745(3)                                 | <i>b</i> = 10.2808(4)                                            | <i>b</i> = 11.8662(7)                                              | <i>b</i> = 24.4817(6)                                             |
|                                                                                      | <i>c</i> = 14.0233(3)                                 | <i>c</i> = 15.7823(6)                                            | <i>c</i> = 19.0966(11)                                             | <i>c</i> = 14.4494(4)                                             |
| $\beta$ (deg.)                                                                       | 90                                                    | 96.725(4)                                                        | 90                                                                 | 90                                                                |
| <i>V</i> (Å <sup>3</sup> )                                                           | 2143.74(9)                                            | 1664.19(11)                                                      | 3513.8                                                             | 4083.76                                                           |
| <i>D</i> (g cm <sup>-3</sup> )                                                       | 3.112                                                 | 2.0110                                                           | 2.146                                                              | 2.852                                                             |
| $\mu$ (mm <sup>-1</sup> )                                                            | 14.215                                                | 8.075                                                            | 8.450                                                              | 13.831                                                            |
| 2 $\theta_{\max}$ (deg.)                                                             | 39.4670                                               | 31.027                                                           | 27.562                                                             | 90.946                                                            |
| GOF on <i>F</i> <sup>2</sup>                                                         | 1.064                                                 | 1.088                                                            | 1.042                                                              | 1.176                                                             |
| <i>R</i> <sub>1</sub> , <i>wR</i> <sub>2</sub> ( <i>I</i> > 2 $\sigma$ ( <i>I</i> )) | 0.0434, 0.0998                                        | 0.0429, 0.1140                                                   | 0.0517, 0.1290                                                     | 0.0365, 0.1119                                                    |
| <i>R</i> <sub>1</sub> , <i>wR</i> <sub>2</sub> (all data)                            | 0.0474, 0.1025                                        | 0.0585, 0.1264                                                   | 0.0743, 0.1469                                                     | 0.0491, 0.1238                                                    |
